# Supplementary material
Source: Royal Society of Chemistry journal article supplement (doi:10.1039/d6ta01059h)
Supplement: d6ta01059h1.pdf [file d6ta01059h1.pdf]

1

## SI Appendix

2 **Decoupling Redox Actives Solubility and Energy Density in Redox Flow**

3 **Batteries Using Supersaturated, Phase-change Electrolytes**

4 Jing Xie<sup>a</sup>, Shrihari Sankarasubramanian<sup>b,c</sup>, Jeffrey G. Catalano<sup>d</sup>, Vijay Ramani<sup>\*a</sup>

5 <sup>a</sup>Department of Energy, Environmental & Chemical Engineering, Washington University in St.  
6 Louis, St. Louis, MO 63130; <sup>b</sup>Department of Biomedical Engineering and Chemical Engineering,  
7 University of Texas at San Antonio, San Antonio, TX 78429; <sup>c</sup>Department of Mechanical,  
8 Aerospace and Industrial Engineering, University of Texas at San Antonio, San Antonio, TX  
9 78429; <sup>d</sup>Department of Earth and Planetary Sciences, Washington University in St. Louis, St.  
10 Louis, MO 63130.

11 \*Corresponding author: Vijay Ramani; 1 Brookings Drive, South Brookings Hall, Room 135, St.  
12 Louis, MO 63130; 314-935-7924; [ramani@wustl.edu](mailto:ramani@wustl.edu)

13

## 14 S1. Materials and Methods

### 15 S1.1. Materials Characterization

16 Scanning electron microscope and energy dispersive X-ray (SEM/EDX) was conducted with  
17 Thermofisher Quattro S ESEM coupled with an Oxford AzTec Energy Dispersive X-Ray  
18 Spectrometer. The acceleration voltage was 5 kV and the working distance between the bottom of  
19 bottom and sample surface was around 10 mm. The weight of carbon felt (CF) was measured with  
20 an analytical and precision balance (VWR-64B). For the raw CF, the measurement was conducted  
21 after it was dried at 60 °C in the oven for 24 h; for the CF after RFB test, it was rinsed with DI  
22 water carefully first followed by the drying and measurement.

### 23 S1.2. RFBs test

24 The flow field was a serpentine type with enlarged inlet and outlet, as shown in Fig. S1. For the  
25 constant-current charge/discharge, a current density of  $\pm 50$  mA/cm<sup>2</sup> was applied until the potential  
26 reached the cut-off value (2 or 1 V); for the following constant-voltage charge/discharge, a voltage  
27 of 2 or 1 V was applied until the current density reached the cut-off value ( $\pm 20$  mA/cm<sup>2</sup>). The  
28 purpose of the constant-voltage phase was to help the system fully charge/discharge. As mentioned  
29 in the main text, a short constant-voltage stage was applied at the beginning for 2 mins, which  
30 typically was terminated by the duration instead of cut-off condition.

31

## 32 S2. Results and Discussion

### 33 S2.1. Speciation in sulfuric acid (H<sub>2</sub>SO<sub>4</sub>)

34 In H<sub>2</sub>SO<sub>4</sub>, the dissociation of protons is governed by the protonation equilibrium as follows:

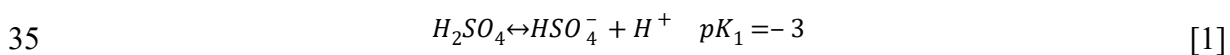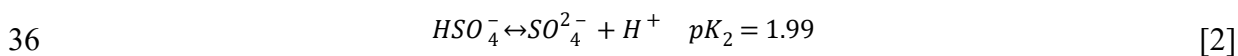

37 where  $pK$  equals to  $-\log(K)$ . The very small  $pK_1$  value suggests that equation (1) could be assumed  
 38 to proceed to completion. Based on this, the abundance of bisulfate ( $\text{HSO}_4^-$ ) and sulfate ( $\text{SO}_4^{2-}$ ) as  
 39 a function of  $pH$  was plotted as shown in Fig. S4. In low  $pH$  ( $< 0$ ) environment,  $\text{HSO}_4^-$  is the  
 40 dominant species; as it becomes more neutral,  $\text{SO}_4^{2-}$  gradually takes precedence.

#### 41 **S2.2. Speciation of ammonium ( $\text{NH}_4^+$ ) and ammonia ( $\text{NH}_3$ )**

42 The dissociation of proton in  $\text{NH}_4^+$  is governed by the following equilibrium:

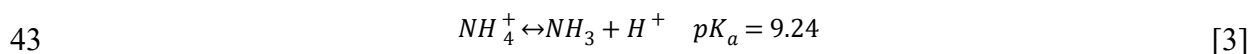

44 Similar as the abundance of  $\text{HSO}_4^-$  and  $\text{SO}_4^{2-}$  in S2.1, when the system  $pH$  equals to  $pK_a$ , the  
 45 amount of conjugate acid and base is the same. Since the  $pH$  of all solutions in our study was  
 46 considerably lower than 9.24, it is reasonable to ignore the proton release from  $\text{NH}_4^+$ .

#### 47 **S2.3. Speciation of cerium(IV) hydrolysis**

48 Four different Ce(IV) hydrolysis was considered as follows:

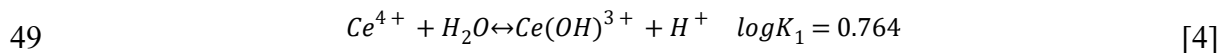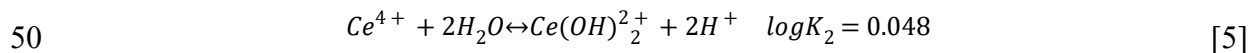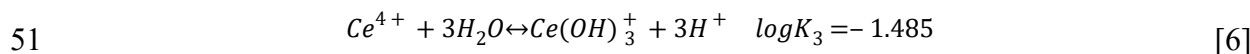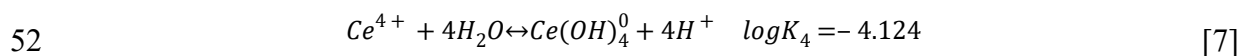

53 The equilibrium constants were taken from previous literature (1, 2). In an ideal case in which no  
 54 other complexation of anions is present, the fraction of different Ce(IV) species was calculated  
 55 based on mass balance principle, shown as follows:

$$56 \quad [\text{Ce}^{4+}] = \frac{1}{1 + \frac{K_1}{[\text{H}^+]} + \frac{K_2}{[\text{H}^+]^2} + \frac{K_3}{[\text{H}^+]^3} + \frac{K_4}{[\text{H}^+]^4}} \quad [8]$$

$$57 \quad [\text{Ce}(\text{OH})^{3+}] = \frac{K_1}{[\text{H}^+]} \times [\text{Ce}^{4+}] \quad [9]$$

$$58 \quad [Ce(OH)_2^{2+}] = \frac{K_2}{[H^+]^2} \times [Ce^{4+}] \quad [10]$$

$$59 \quad [Ce(OH)_3^+] = \frac{K_3}{[H^+]^3} \times [Ce^{4+}] \quad [11]$$

$$60 \quad [Ce(OH)_4^0] = \frac{K_4}{[H^+]^4} \times [Ce^{4+}] \quad [12]$$

61 The corresponding speciation curve is depicted in Fig. S5.

## 62 S2.4 Deconvolution of Raman spectra in OH stretching region

63 As polar molecule, the oxygen atom in a water molecule is negatively charged, and the two  
 64 hydrogen atoms are positively charged. Thus, the oxygen atom is considered as an acceptor, and  
 65 the hydrogen atom is a donor. Based on the different number and location of hydrogen bond  
 66 formed in a water molecule, the hydrogen bond is classified into five categories: single donor-  
 67 double acceptor (DAA, 3004  $\text{cm}^{-1}$ ), double donor-double acceptor (DDAA, 3227  $\text{cm}^{-1}$ ), single  
 68 donor-single acceptor (DA, 3431  $\text{cm}^{-1}$ ), double donor-single acceptor (DDA, 3565  $\text{cm}^{-1}$ ), and free  
 69 OH vibrations (3633  $\text{cm}^{-1}$ ) (3). The deconvoluted spectra are displayed in Fig. S6.

## 70 S2.5 Theoretical calculation

### 71 S2.5.1 0.123 M $\text{Ce}(\text{SO}_4)_2$ in water

72 The  $pH$  decreased from 7 (water) to 0.7 after dissolution, and all acidity came from  $\text{Ce}(\text{IV})$   
 73 hydrolysis. Besides, we assume that sulfate species was in  $\text{HSO}_4^-$ . The concentration of total  
 74 protons was:

$$75 \quad \text{TOT } H^+ = \text{TOT } \text{SO}_4 + 10^{-pH} = 0.123 \times 2 + 10^{-0.7} = 0.4455 \text{ M} \quad [13]$$

76 the ratio between total protons and  $\text{Ce}(\text{IV})$  was:

$$77 \quad \frac{\text{TOT } H^+}{\text{TOT } \text{Ce}(\text{IV})} = \frac{0.4455}{0.123} = 3.62 \approx 3.5 \quad [14]$$

78 The result indicates that for each Ce(IV), 3.5 protons were released from hydrolysis. Thus, it is  
79 proposed that the dominant hydrolysis reactions were equations (6) and (7).

#### 80 **S2.5.2 0.123 M Ce(SO<sub>4</sub>)<sub>2</sub> in 1.05 M H<sub>2</sub>SO<sub>4</sub>**

81 The *pH* decreased from -0.12 (H<sub>2</sub>SO<sub>4</sub>) to -0.19 after dissolution, and the acidity came from both  
82 H<sub>2</sub>SO<sub>4</sub> and Ce(IV). Due to the extremely low *pH* value, H<sub>2</sub>SO<sub>4</sub> would only undergo the first  
83 deprotonation completely, and all sulfate species was in HSO<sub>4</sub><sup>-</sup>. The concentration of protons  
84 released by Ce(IV) was calculated as follows:

$$\begin{aligned} 85 \quad \text{TOT } H^+ \text{ by Ce(IV)} &= \text{TOT } SO_4 \text{ from Ce(SO}_4)_2 + 10^{-pH_2} - 10^{-pH_1} \\ 86 \quad &= 0.123 \times 2 + 10^{0.19} - 10^{0.12} = 0.4766 \text{ M} \end{aligned} \quad [15]$$

87 where the first term represents the protons required to protonate SO<sub>4</sub><sup>2-</sup> from Ce(SO<sub>4</sub>)<sub>2</sub>, and the rest  
88 reveal the *pH* change. The ratio between protons released by Ce(IV) and Ce(IV) concentration was  
89 calculated by

$$90 \quad \frac{\text{TOT } H^+ \text{ by Ce(IV)}}{\text{TOT Ce(IV)}} = \frac{0.4766}{0.123} = 3.87 \approx 4 \quad [16]$$

91 This result suggests that the main hydrolysis reaction was equation (7). Combined with the fact  
92 that the stable structure of Ce(IV) and sulfate complex is achieved when Ce:HSO<sub>4</sub><sup>-</sup> is 1:3 (4), we  
93 propose that the Ce(IV) structure in our study was [Ce(OH)<sub>4</sub>(HSO<sub>4</sub><sup>-</sup>)<sub>3</sub>]<sup>3-</sup>. This is slightly different  
94 from the structure reported previously (4), and the reason is explained in the main text: the Ce(IV)  
95 concentration used in previous study was exceptionally low.

#### 96 **S2.5.3 0.123 M Ce(SO<sub>4</sub>)<sub>2</sub> in 1.05 M AS**

97 The *pH* decreased from 5.4 (AS) to 1.63 after dissolution. While all acidity came from Ce(IV)  
98 hydrolysis, sulfate species was in both HSO<sub>4</sub><sup>-</sup> and SO<sub>4</sub><sup>2-</sup> since the *pH* was close to *pK*<sub>2</sub> of H<sub>2</sub>SO<sub>4</sub>.  
99 It is again assumed that Ce:HSO<sub>4</sub><sup>-</sup> was 1:3 in complex, thus the concentration of free sulfate species  
100 was calculated as follows:

101 
$$Free SO_4 = 1.05 + 0.123 \times 2 - 0.123 \times 3 = 0.927 M \quad [17]$$

102 where the first and second term represent sulfate species from AS and Ce(SO<sub>4</sub>)<sub>2</sub>, respectively, and  
 103 the third term represents the sulfate species bound with Ce(IV). Next, according to the second  
 104 deprotonation equilibrium of H<sub>2</sub>SO<sub>4</sub>, the concentration of HSO<sub>4</sub><sup>-</sup> and SO<sub>4</sub><sup>2-</sup> obeys the following  
 105 relationship:

106 
$$\frac{[SO_4^{2-}][H^+]}{[HSO_4^-]} = 10^{-1.99} \quad [18]$$

107 from which the concentration of free in solution was calculated by

108 
$$Free HSO_4^- = 0.927 \times \frac{2.29}{2.29 + 1} = 0.6452 M \quad [19]$$

109 Then the amount of total protons was

110 
$$TOT H^+ = free HSO_4^- + HSO_4^- \text{ complexed with Ce(IV)} + pH$$
  
 111 
$$= 0.6452 + 0.123 \times 3 + 10^{-1.63} = 1.038 M \quad [20]$$

112 The ratio between protons released by Ce(IV) and Ce(IV) concentration was then calculated as

113 
$$\frac{TOT H^+}{TOT Ce(IV)} = \frac{1.038}{0.123} = 8.45 \approx 8 \quad [21]$$

114 This suggests that about eight protons were required for the dissolution of each Ce(IV). According  
 115 to our analysis above, however, the highest number of protons released from water hydrolysis was  
 116 four. Given this result, we propose a new Ce(IV) hydrolysis process in this case which incorporates  
 117 NH<sub>4</sub><sup>+</sup> as follows:

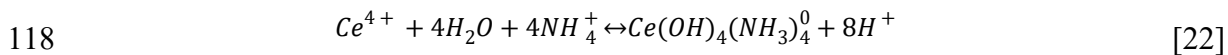

119 **S2.5.4 Diffusion coefficient (*D*<sub>0</sub>) and standard rate constant (*k*<sub>0</sub>)**

120 Since the electron transfer coefficient,  $\alpha$ , was calculated manually according to equation 7 in the  
121 main text, the Nicholson-Shain (N-S) and Klingler-Kochi (K-K) equations were modified by  
122 moving the  $\alpha$  term to the left-hand side as follows.

123 For N-S:

$$\frac{i_p}{\alpha^2} = (2.99 \times 10^5) n^{3/2} A C_0 D_0^{1/2} \nu^{1/2} \quad [23]$$

125 For K-K equation, by defining  $\chi$ :

$$\chi = \exp \left[ \frac{\alpha n F}{RT} |E_p - E_0| \right] / \alpha^{1/2} \quad [24]$$

127 then

$$\chi = \frac{2.18}{k_0} \left[ \frac{D_0 n F}{RT} \right]^{1/2} \nu^{1/2} \quad [25]$$

129  $i_p/\alpha^{0.5}$  vs.  $\nu^{0.5}$  and  $\chi$  vs.  $\nu^{0.5}$  were plotted to obtain N-S and K-K plot, respectively, as shown in Fig.  
130 S7. The slopes of new N-S and K-K plots were used to calculate the value of  $D_0$  and  $k_0$  and the  
131 results are tabulated in table S6.

## 132 S2.6 Ti-Ce RFBs test

### 133 S2.6.1 Single charge of V-Ti RFB

134 To transfer the original Ti(IV) electrolyte into Ti(III), vanadium(V) oxysulfate was dissolved into  
135 AS and paired with Ti(IV) to form a V-Ti RFB. The charge process was used to reduce Ti(IV) into  
136 Ti(III) based on the following reaction:

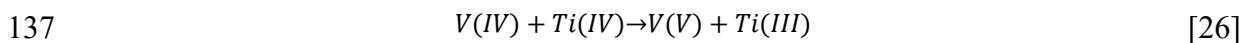

138 The concentration and volume of both V(IV) and Ti(IV) was 1.23 M and 50 mL, respectively. The  
139 theoretical time required for a full charge could be calculated as follows:

$$Time = \frac{CVF}{iA} \quad [27]$$

140  
141 where  $C$  is concentration (1.23 M),  $V$  is electrolyte volume (0.05 L),  $F$  is Faraday constant (96485  
142 C/mol),  $i$  is current density (50 mA/cm<sup>2</sup>), and  $A$  is electrode surface area (25 cm<sup>2</sup>). The theoretical  
143 charge time is calculated as 1.32 h, and the actual experimental time was 1.2 h when the high  
144 frequency resistance (HFR) was raised to a very high level due to the deposition of V on the  
145 membrane surface, as shown in Fig. S10.

146

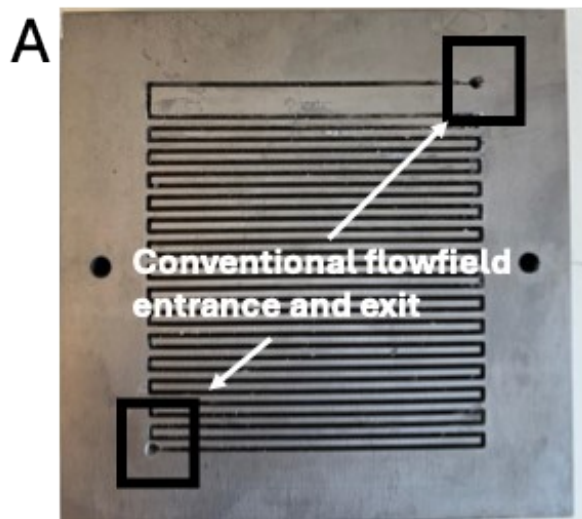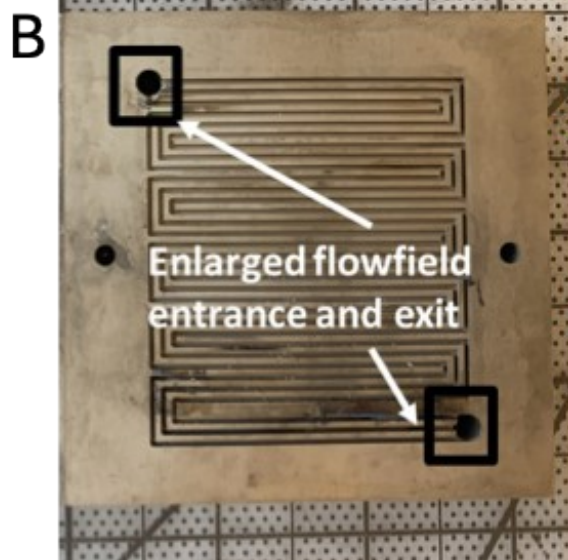

147

148 **Figure S1.** Serpentine flow field with conventional (A) and enlarged (B) entrance and exit.

149

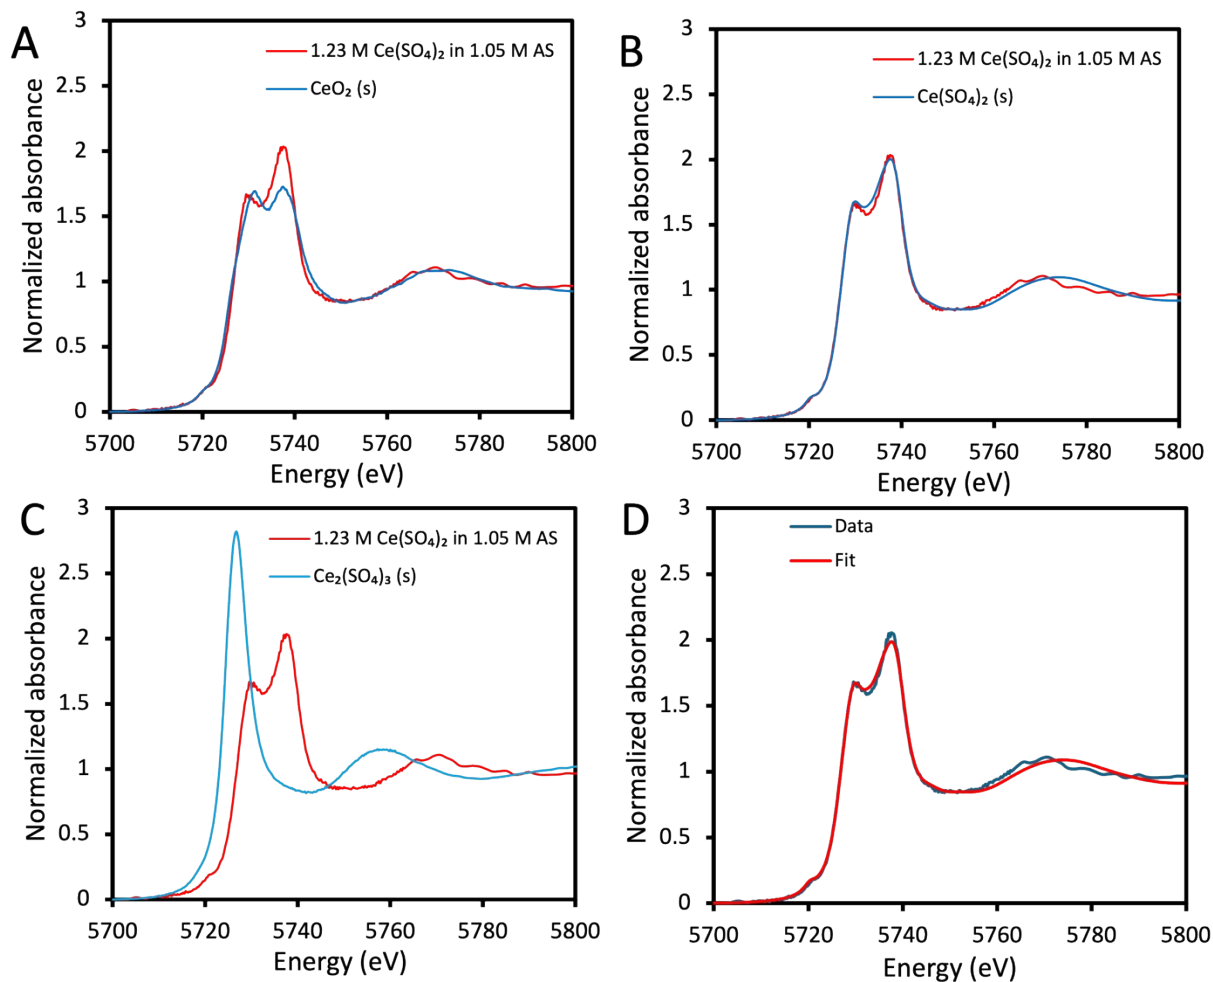

150

151 **Figure S2.** Comparison of the Ce L<sub>III</sub>-edge XANES spectrum of 1.23 M Ce(SO<sub>4</sub>)<sub>2</sub> in 1.05 M AS  
 152 solution with the solid phase of (A) CeO<sub>2</sub>, (B) Ce(SO<sub>4</sub>)<sub>2</sub>, and (C) Ce<sub>2</sub>(SO<sub>4</sub>)<sub>3</sub>. (D) Linear-  
 153 combination fit of the Ce L<sub>III</sub>-edge XANES spectrum of 1.23 M Ce(SO<sub>4</sub>)<sub>2</sub> in 1.05 M AS solution  
 154 with the spectra of Ce(SO<sub>4</sub>)<sub>2</sub> and Ce<sub>2</sub>(SO<sub>4</sub>)<sub>3</sub> standards.  
 155

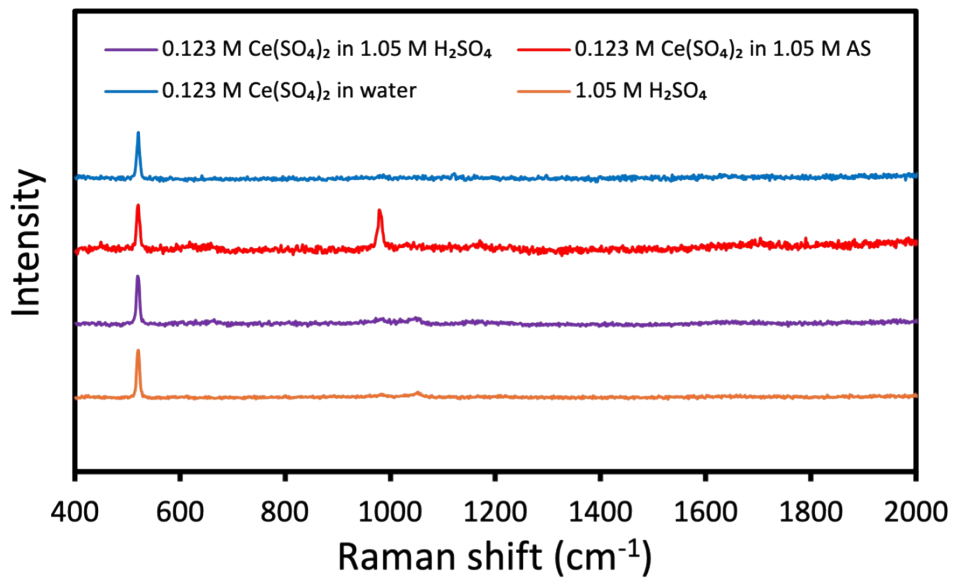

156

157 **Figure S3.** Low-frequency Raman spectra of a fixed concentration of Ce(SO<sub>4</sub>)<sub>2</sub> in different  
158 supporting electrolytes.  
159

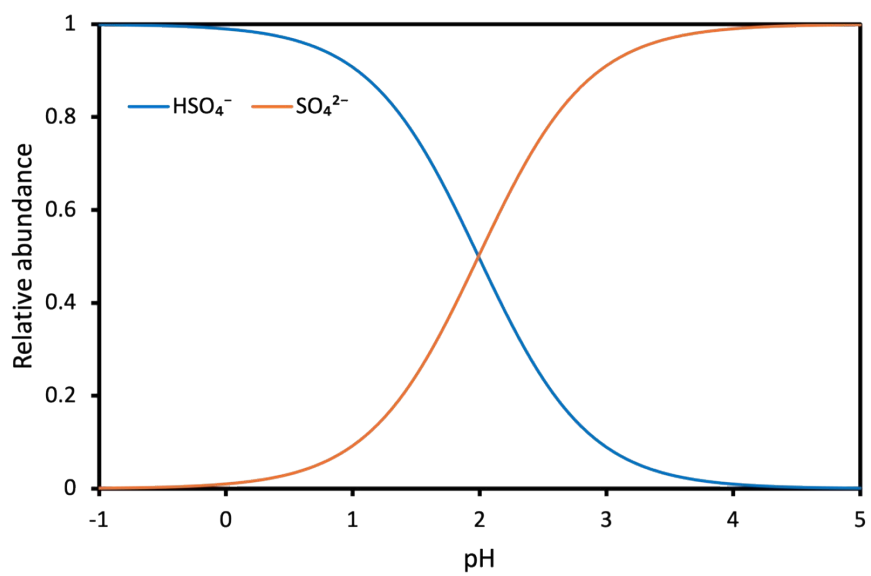

160

161

**Figure S4.** Speciation of  $\text{H}_2\text{SO}_4$  solution as a function of  $pH$ .

162

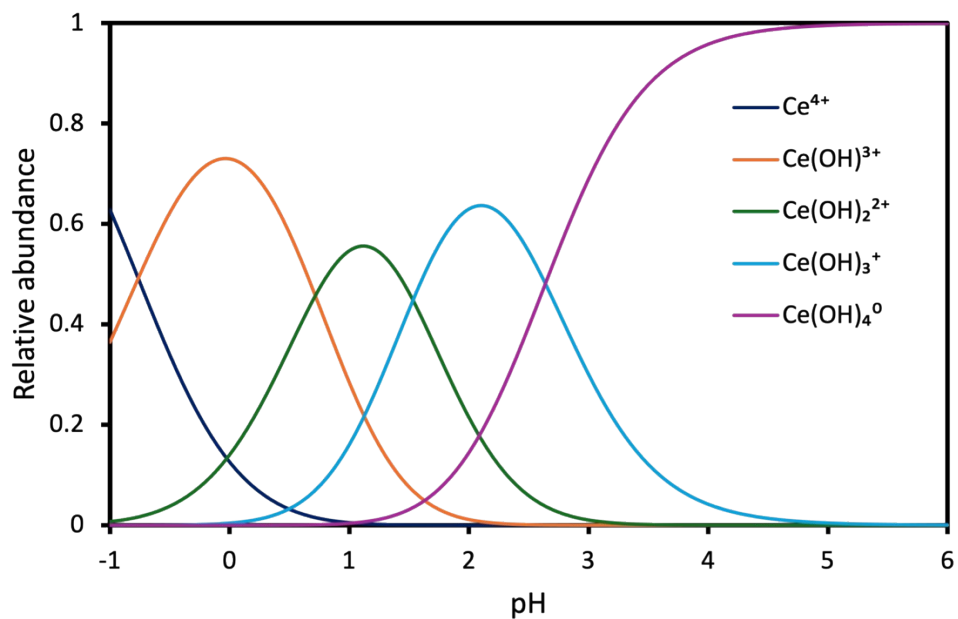

163

164

**Figure S5.** Speciation of Ce(IV) hydrolysis as a function of  $pH$ .

165

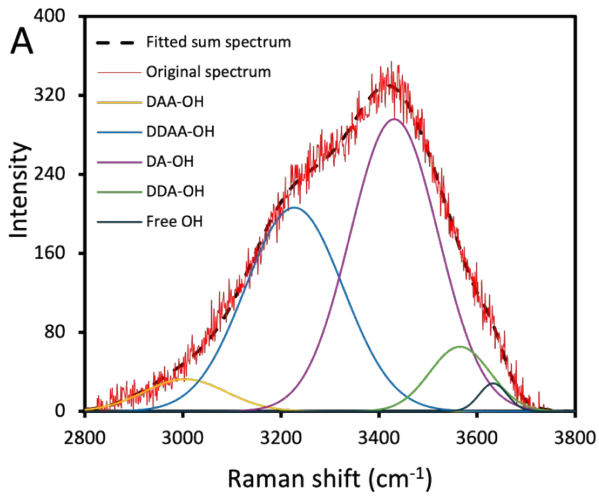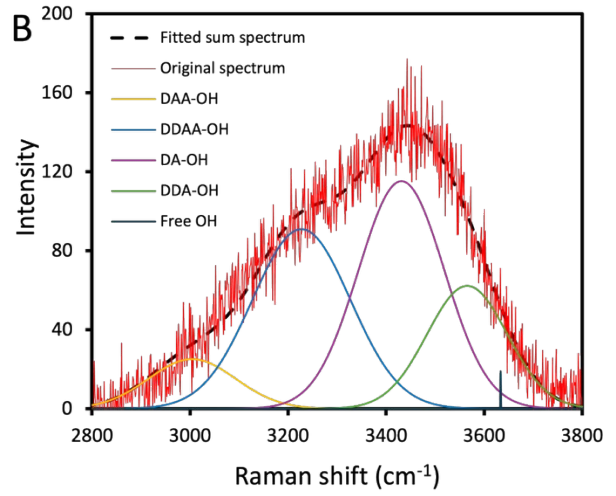

166

167 **Figure S6.** Deconvolution of high-frequency Raman spectra for 1.05 M AS (A), 1.23 M  
 168  $\text{Ce}(\text{SO}_4)_2$  in 1.05 M AS (B).  
 169

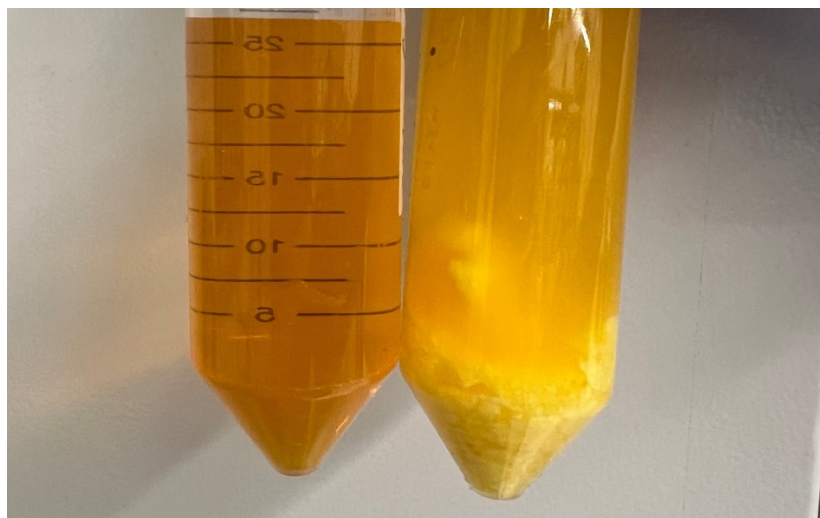

170

171 **Figure S7.** 0.123 M  $\text{Ce}(\text{SO}_4)_2$  in water: freshly prepared (left) and six hours after preparation  
172 (right).

173

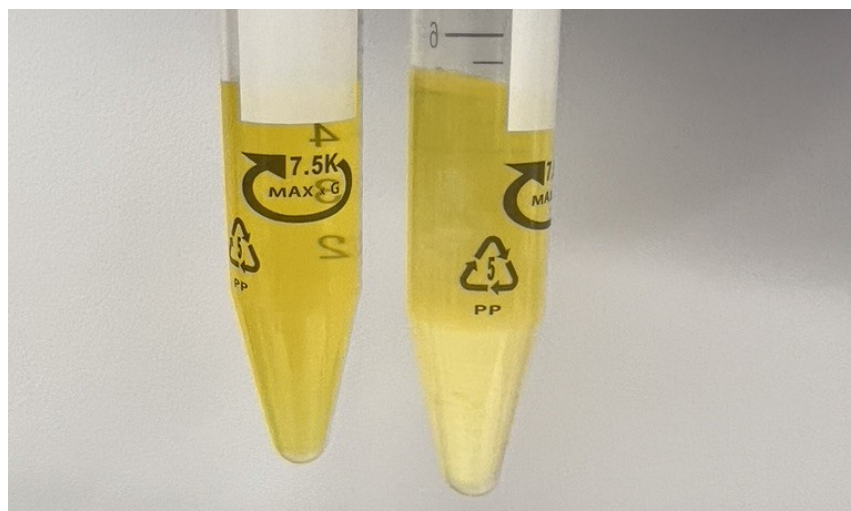

174

175

176

177

**Figure S8.** 0.123 M  $\text{Ce}(\text{SO}_4)_2$  in 1.05 M AS: freshly prepared (left) and six hours after preparation (right).

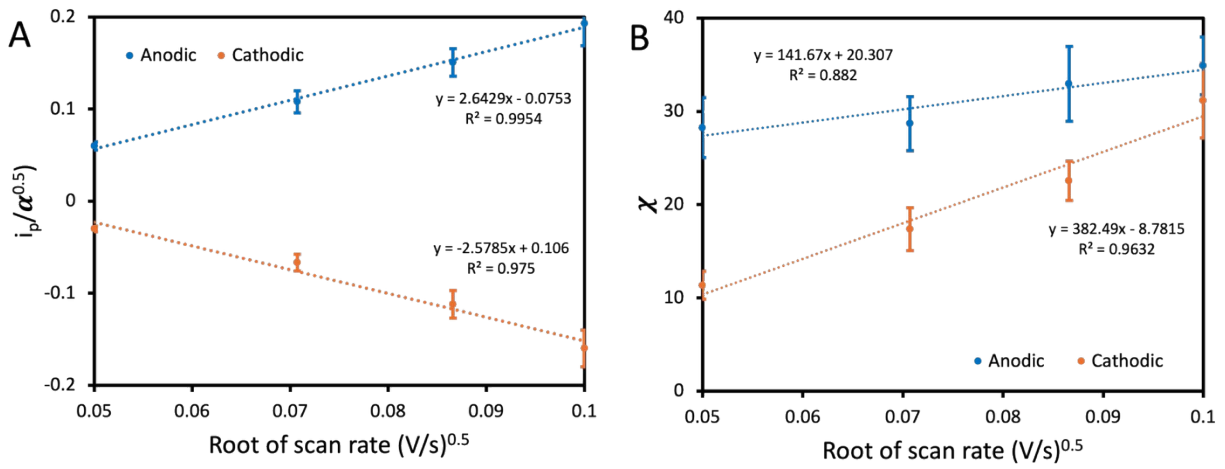

178

179

**Figure S9.** N-S (A) and K-K (B) plots of 0.123 M Ce(SO<sub>4</sub>)<sub>2</sub> in 1.05 M AS.

180

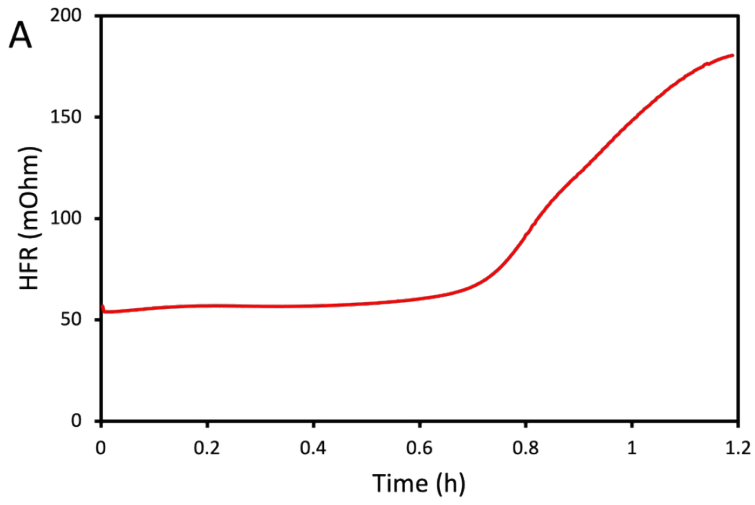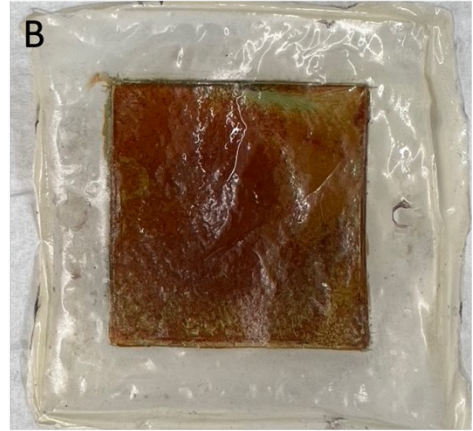

181

182 **Figure S10.** HFR curve of single charge process of V-Ti RFB (A) and membrane surface  
183 deposition after the charge (B).  
184

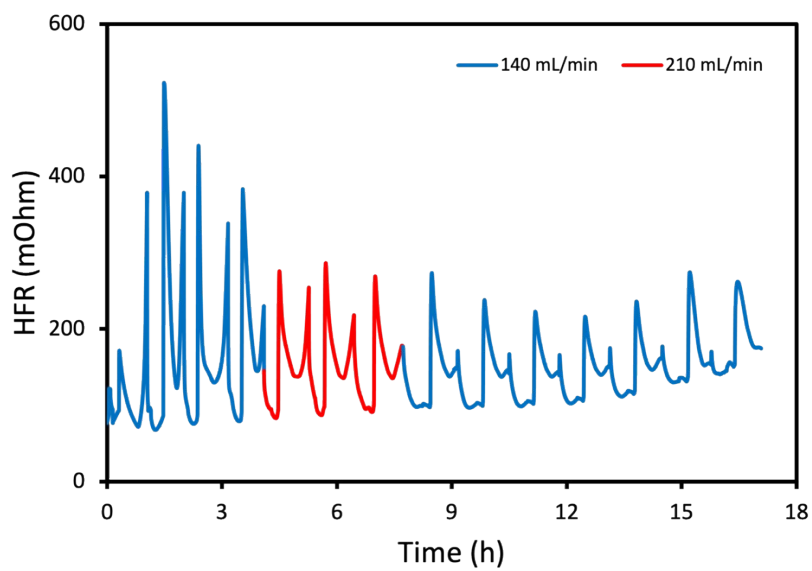

185

186

**Figure S11.** HFR curve Ti-Ce RFB applying different flow rates.

187

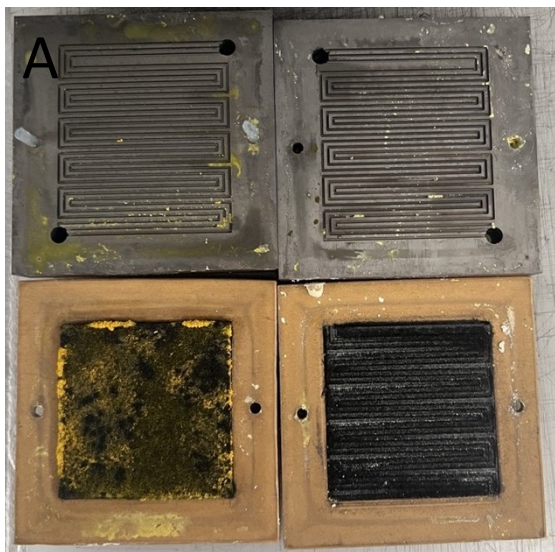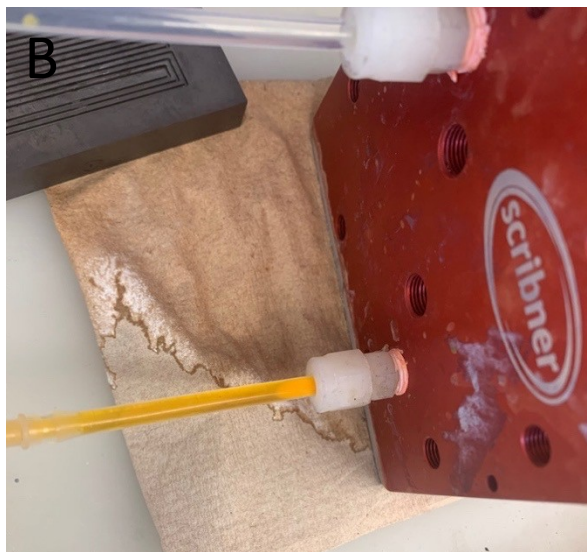

188

189

190

**Figure S12.** Ce precipitation in flow channel and electrode (A), and clogging of tube (B).

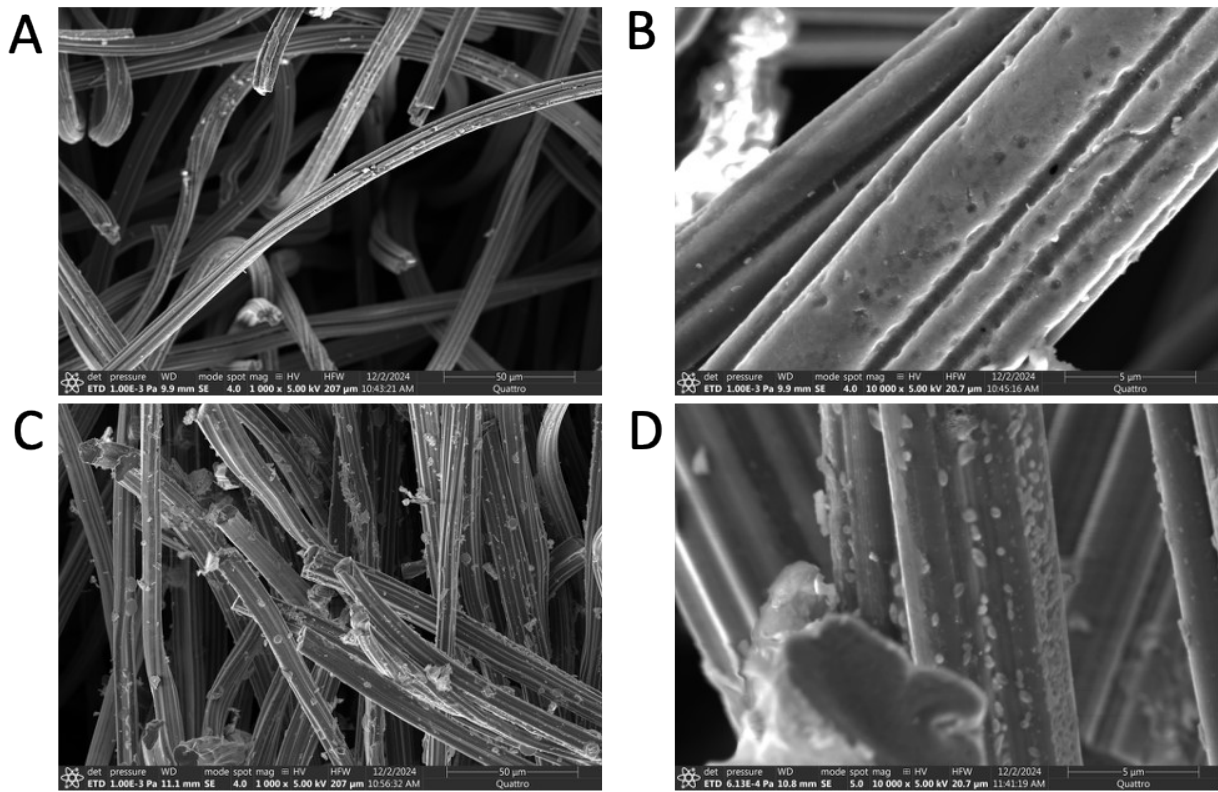

191

192 **Figure S13.** SEM of (A) and (B) CF before Ti-Ce RFB test, (C) and (D) CF after Ti-Ce RFB test.

193

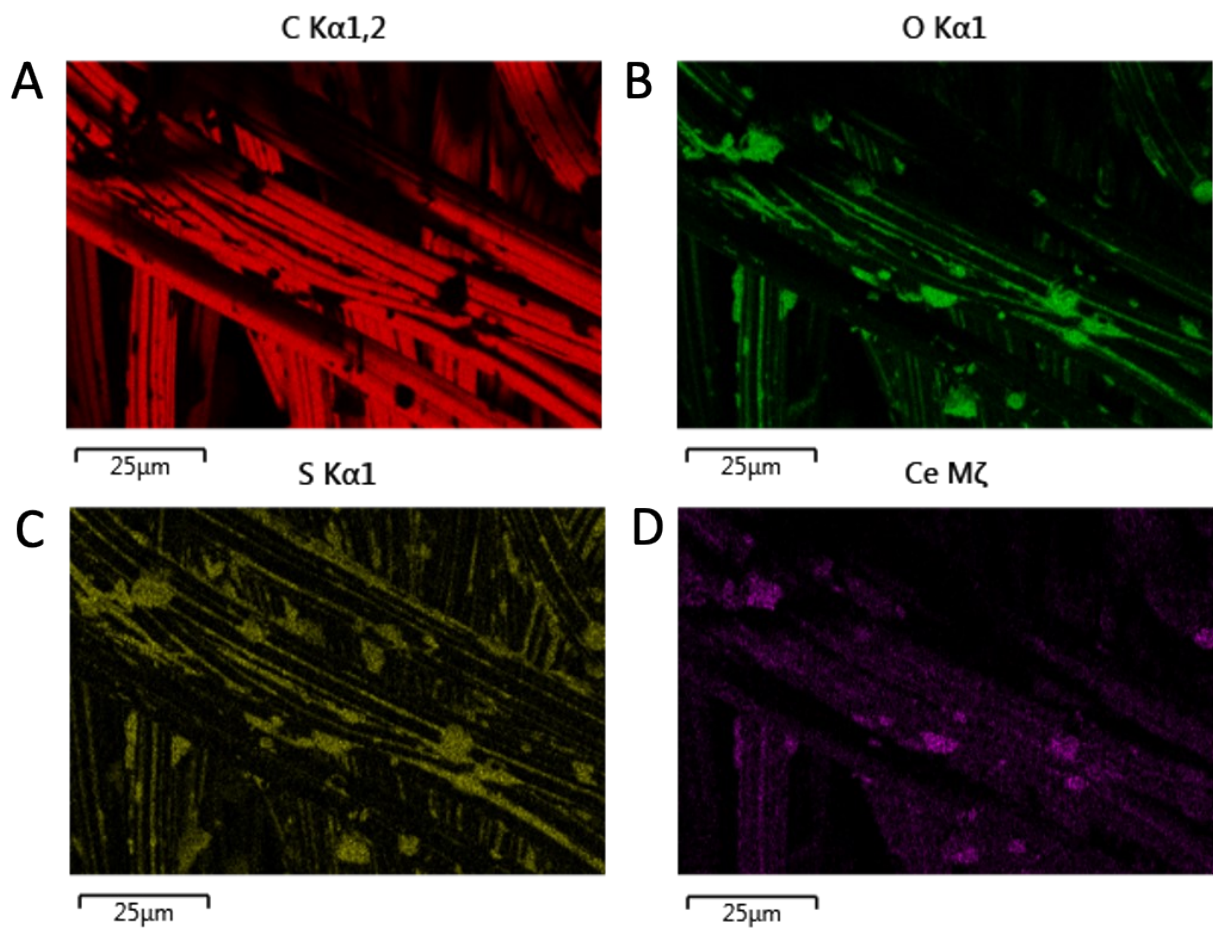

194

195 **Figure S14.** EDX of (A) carbon, (B) oxygen, (C) sulfur, and (D) cerium on CF after Ti-Ce RFB  
 196 test.  
 197

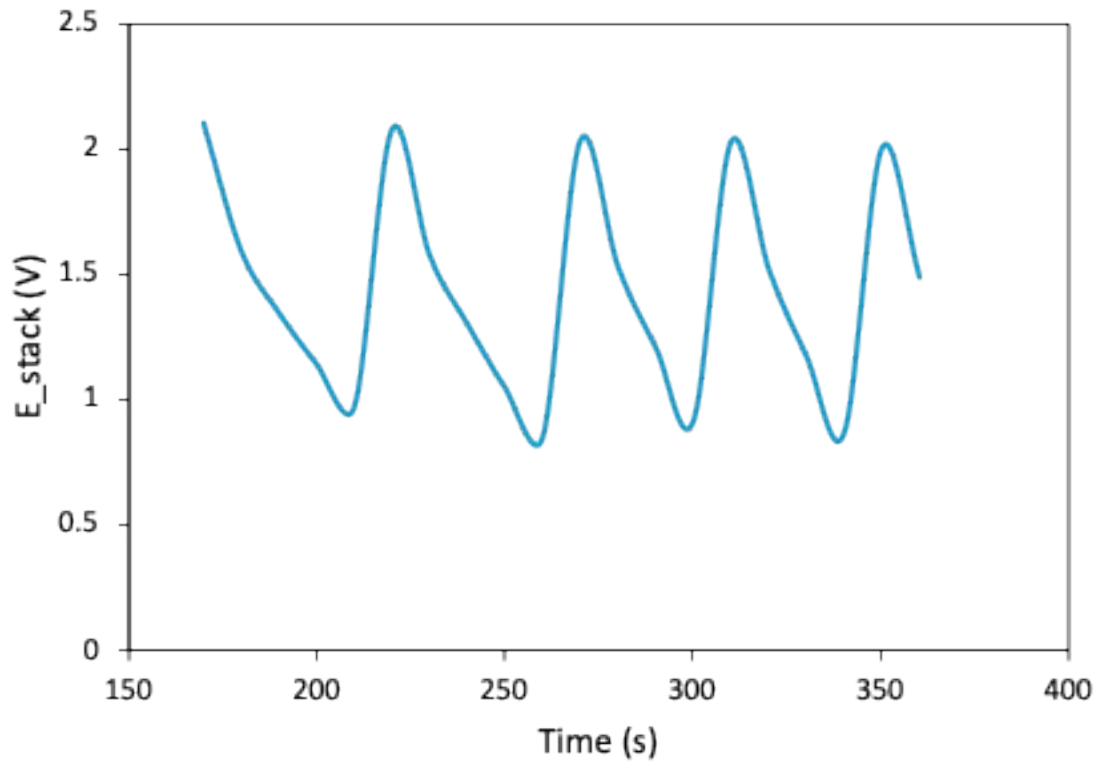

198

199 **Figure S15.** Cell voltage of Ti-Ce RFB test with conventional flow field entrance and exit design.  
200

201

**Table S1** pH values of different Ce(IV) electrolytes

| <b>Sample #</b> | <b>Composition</b>                                                                 | <b>pH</b> |
|-----------------|------------------------------------------------------------------------------------|-----------|
| 1               | 1.23 M Ce(SO <sub>4</sub> ) <sub>2</sub> in 1.05 M AS                              | -0.16     |
| 2               | 0.123 M Ce(SO <sub>4</sub> ) <sub>2</sub> in 1.05 M AS                             | 1.63      |
| 3               | 0.0123 M Ce(SO <sub>4</sub> ) <sub>2</sub> in 1.05 M AS                            | 2.60      |
| 4               | 1.05 M AS                                                                          | 5.40      |
| 5               | 0.123 M Ce(SO <sub>4</sub> ) <sub>2</sub> in 1.05 M H <sub>2</sub> SO <sub>4</sub> | -0.19     |
| 6               | 0.123 M Ce(SO <sub>4</sub> ) <sub>2</sub> in water                                 | 0.70      |
| 7               | 1.05 M H <sub>2</sub> SO <sub>4</sub>                                              | -0.12     |

202

203 **Table S2** Effect of Ce(IV) electrolyte on carbon paper (CP) and carbon felt (CF) in Figs. 3A and  
 204 3B

|           | Before immersion |          |              |          |          | After immersion |          |              |          |          |
|-----------|------------------|----------|--------------|----------|----------|-----------------|----------|--------------|----------|----------|
|           | $E_{pa}$         | $E_{pc}$ | $\Delta E_p$ | $i_{pa}$ | $i_{pc}$ | $E_{pa}$        | $E_{pc}$ | $\Delta E_p$ | $i_{pa}$ | $i_{pc}$ |
|           | (V)              | (V)      | (V)          | (mA)     | (mA)     | (V)             | (V)      | (V)          | (mA)     | (mA)     |
| <b>CP</b> | 1.278            | 0.949    | 0.329        | 1.92     | -2.54    | 1.270           | 0.994    | 0.276        | 2.49     | -2.62    |
| <b>CF</b> | 1.274            | 0.897    | 0.377        | 37.6     | -14.5    | 1.352           | 0.918    | 0.434        | 37.4     | -22.5    |

205  $E_{pa}$ : anodic peak potential;  $E_{pc}$ : cathodic peak potential;  $\Delta E_p$ : peak separation;  $i_{pa}$ : anodic peak  
 206 current;  $i_{pc}$ : cathodic peak current.  
 207

208

**Table S3** Electron transfer coefficient ( $\alpha$ ) calculated from Fig. 3C

| Scan rate (mV/s) | $\alpha_a$ | $\alpha_c$ |
|------------------|------------|------------|
| 2.5              | 0.394      | 0.233      |
| 5                | 0.302      | 0.233      |
| 7.5              | 0.262      | 0.218      |
| 10               | 0.219      | 0.209      |

209  $\alpha_a$ : anodic transfer coefficient;  $\alpha_c$ : cathodic transfer coefficient

210

211

**Table S4** Electron  $D_0$  and  $k_0$  values of Ce cathodic reaction

| <b>Parameters</b>                             | <b>Ce(IV) + e<sup>-</sup>→Ce(III)</b> |
|-----------------------------------------------|---------------------------------------|
| $D_0$ (x 10 <sup>-4</sup> cm <sup>2</sup> /s) | 49.2 ± 3.9                            |
| $k_0$ (x 10 <sup>-4</sup> cm/s)               | 24.9 ± 2.8                            |

212

**Table S5** Conductivity of Ti and Ce electrolytes

| <b>Sample</b>                                           | <b>Original solution<br/>(mS/cm)</b> | <b>10 times diluted solution<br/>(mS/cm)</b> |
|---------------------------------------------------------|--------------------------------------|----------------------------------------------|
| 0.9 M Ce(III) in 2 M CH <sub>3</sub> SO <sub>3</sub> H  | 272.4 ± 8.6                          | 109.4 ± 5.3                                  |
| 0.9 M Ti(IV) in 3.8 M CH <sub>3</sub> SO <sub>3</sub> H | > 9999                               | 132.3 ± 4.1                                  |
| 1.23 M Ce(IV) in 1.05 M AS                              | 261.1 ± 10.9                         | 86.1 ± 4.9                                   |
| 1.23 M Ti(IV) in 1.9 M AS                               | 247.8 ± 9.8                          | 60.5 ± 2.6                                   |

214 \* The conductivity of original Ti-CH<sub>3</sub>SO<sub>3</sub>H electrolyte was too high to be detected within the  
215 range of conductivity meter.

216

217

**Table S6** Weight of CF before and after cycling test

| <b>CF</b>      | <b>Weight (g)</b>   |
|----------------|---------------------|
| Before cycling | $1.3132 \pm 0.0065$ |
| After cycling  | $2.5035 \pm 0.0098$ |

218

219

220 **Reference**

- 221 1. S. A. Hayes, P. Yu, T. J. O'Keefe, M. J. O'Keefe and J. O. Stoffer, The phase stability of cerium  
222 species in aqueous systems: I. E-pH diagram for the system. *J. Electrochem. Soc.*, 2002, **149**,  
223 C623-C630.
- 224 2. B. Bouchaud, J. Balmain, G. Bonnet and F. Pedraza, pH-distribution of cerium species in  
225 aqueous systems. *J. Rare Earths*, 2012, **30**, 559-562.
- 226 3. Q. Sun, The Raman OH stretching bands of liquid water. *Vib. Spectrosc.*, 2009, **51**, 213-217.
- 227 4. C. A. Buchanan, D. Herrera, M. Balasubramanian, B. R. Goldsmith and N. Singh, Unveiling  
228 the cerium(III)/(IV) structures and charge-transfer mechanism in sulfuric acid. *JACS Au*, 2022, **2**,  
229 2742-2757.
